# Supplementary material for: Trained Immunity Enhances Human Monocyte Function in Aging and Sepsis
Source: PubMed Central journal article supplement (PMC9174537; doi:10.3389/fimmu.2022.872652), 2022-05-25
Supplement: DataSheet_1.pdf [file DataSheet_1.pdf]

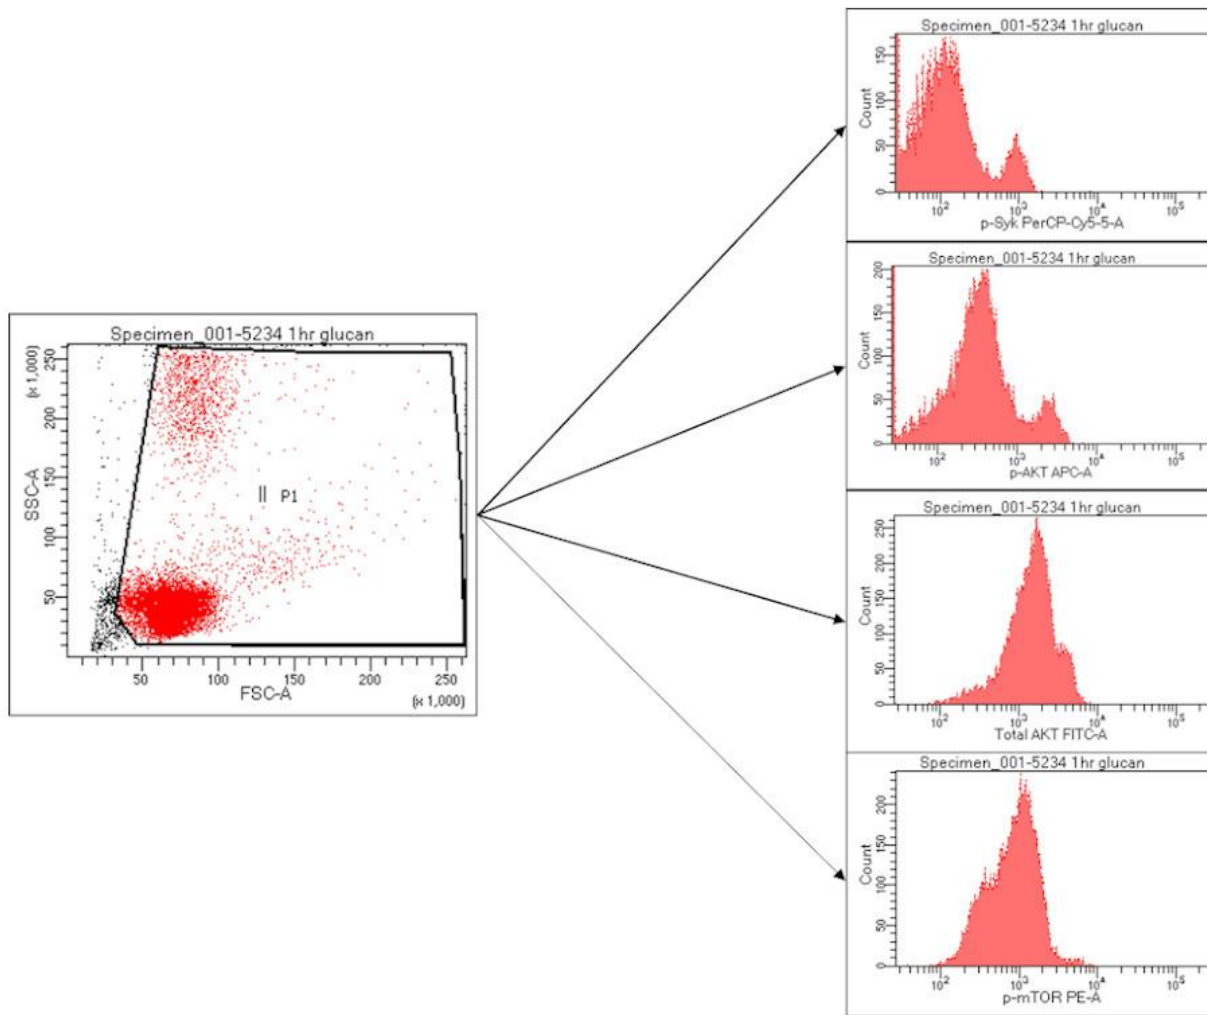

**Supplemental Figure 2. Flow cytometry gating strategy for intracellular signaling experiments.** Cells isolated using magnetic separation for CD14<sup>+</sup> monocytes were gated by FSC and SSC to remove debris. Mean fluorescence of intracellular signaling proteins in this population was used as an experimental measure.
